# Supplementary material for: Targeted delivery and controlled release of doxorubicin to cancer cells by smart ATP-responsive Y-shaped DNA structure-capped mesoporous silica nanoparticles
Source: Royal Society of Chemistry journal article supplement (doi:10.1039/d0tb01960g), 2021-01-01
Supplement: d0tb01960g1.pdf [file d0tb01960g1.pdf]

## Supplementary information

# **Targeted delivery and controlled release of doxorubicin to cancer cells by smart ATP-responsive Y-shaped DNA structure-capped mesoporous silica nanoparticles**

Elnaz Bagheri<sup>a,b</sup>, Mona Aliboland<sup>a,b</sup>, Khalil Abnous<sup>c</sup>, Seyed Mohammad Taghdisi<sup>d,\*</sup>, Mohammad Ramezani<sup>a,b,e,\*\*</sup>

<sup>a</sup> Pharmaceutical Research Center, Pharmaceutical Technology Institute, Mashhad University of Medical Sciences, Mashhad, Iran

<sup>b</sup> Department of Pharmaceutical Biotechnology, School of Pharmacy, Mashhad University of Medical Sciences, Mashhad, Iran

<sup>c</sup> Department of Medicinal Chemistry, School of Pharmacy, Mashhad University of Medical Sciences, Mashhad, Iran

<sup>d</sup> Targeted Drug Delivery Research Center, Pharmaceutical Technology Institute, Mashhad University of Medical Sciences, Mashhad, Iran

<sup>e</sup> Nanotechnology Research Center, Pharmaceutical Technology Institute, Mashhad University of Medical Sciences, Mashhad, Iran

### **Corresponding Authors:**

**Prof. Mohammad Ramezani**, Prof. of Pharmaceutical Biotechnology, Nanotechnology Research Center, School of Pharmacy, Mashhad University of Medical Sciences, Mashhad, Iran. Tel/Fax: +98 51 37112470, E-mail: [ramezanim@mums.ac.ir](mailto:ramezanim@mums.ac.ir)

**Dr. Seyed Mohammad Taghdisi**, Associate Prof. of Pharmaceutical Biotechnology, Targeted Drug Delivery Research Center, School of Pharmacy, Mashhad University of Medical Sciences, Mashhad, Iran. Tel/Fax: +98 51 31801203, E-mail: [taghdisihm@mums.ac.ir](mailto:taghdisihm@mums.ac.ir)

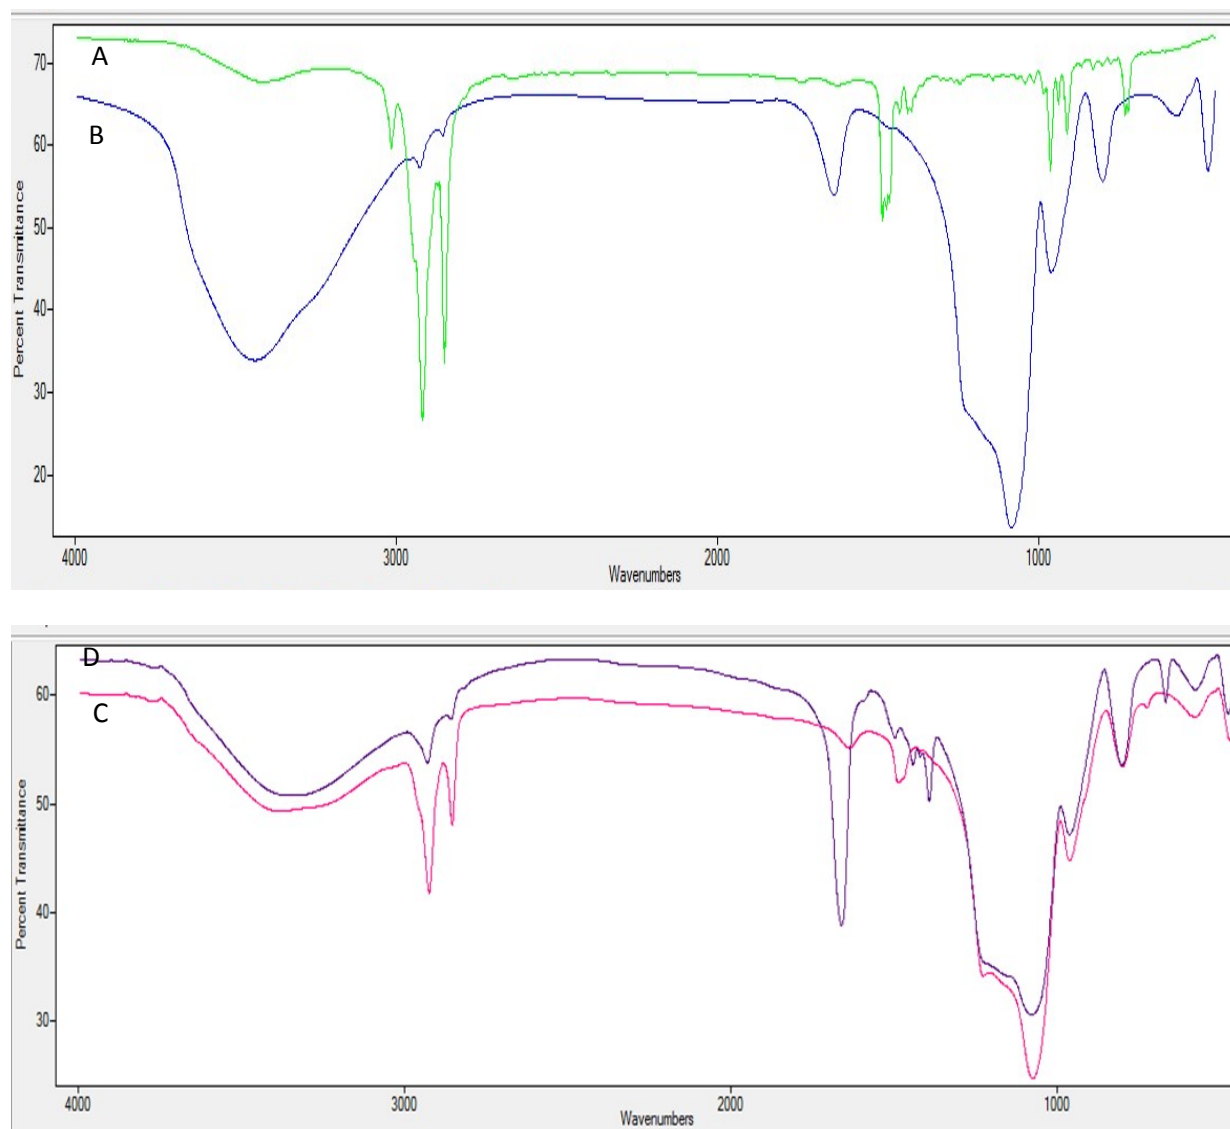

Figure S1. FTIR spectra of (A) CTAB (B) MSNs (C) MSNs-NH<sub>2</sub> and (D) MSNs-COOH.

**A**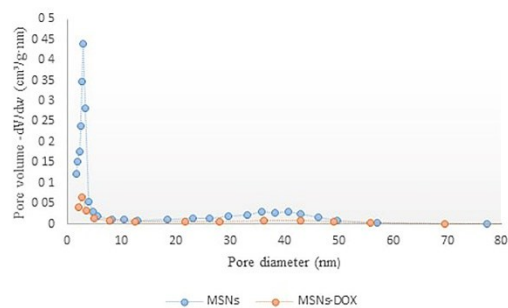**B**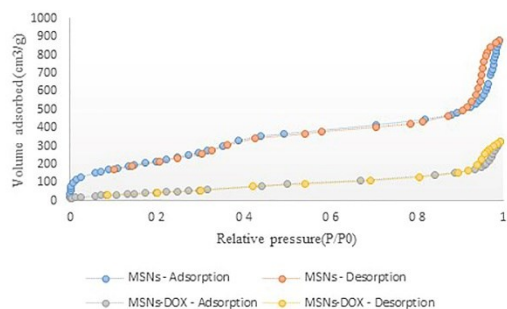

Figure S2. Nitrogen adsorption–desorption isotherms and pore size distribution of MSNs.

| Sample   | BET                                         | BET                              | BJH                |
|----------|---------------------------------------------|----------------------------------|--------------------|
|          | surface area (m <sup>2</sup> /g)            | pore volume (cm <sup>3</sup> /g) | pore diameter (nm) |
| MSN      | 837 m <sup>2</sup> /g ± 7 m <sup>2</sup> /g | 1.09                             | 2.9                |
| DOX@ MSN | 7145 m <sup>2</sup> /g                      | 0.88                             |                    |

Table S1. Data representation for Nitrogen adsorption–desorption test and pore size distribution of the synthesized MSN and prepare DOX@MSN

| Sample               | Size (nm) | PDI        | Zeta potential [mV] |
|----------------------|-----------|------------|---------------------|
| MSNs                 | 115.3±5   | 0.204±.023 | -7.8±0.7            |
| MSNs-NH <sub>2</sub> | 121±4.5   | 0.27±.036  | +16.5±0.7           |
| MSNs-COOH            | 145±6     | 0.456±.012 | -58.1±0.4           |

Table S2. Dynamic light scattering measurements of the MSNs, MSNs-NH<sub>2</sub> and MSNs-COOH.

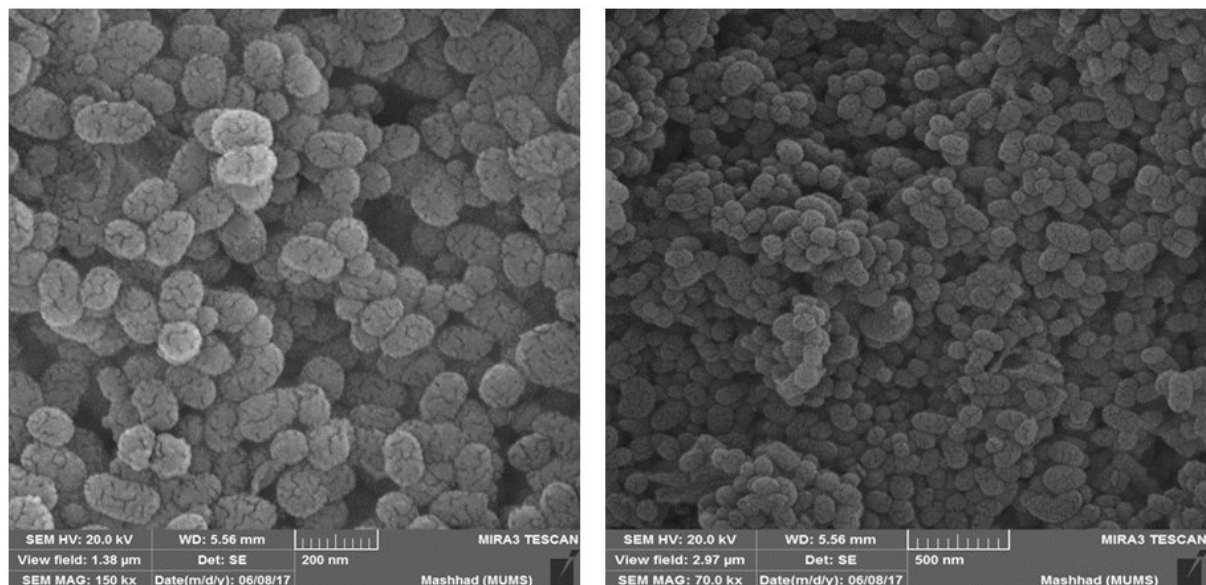

Figure S3. SEM images of MSNs at different resolutions.

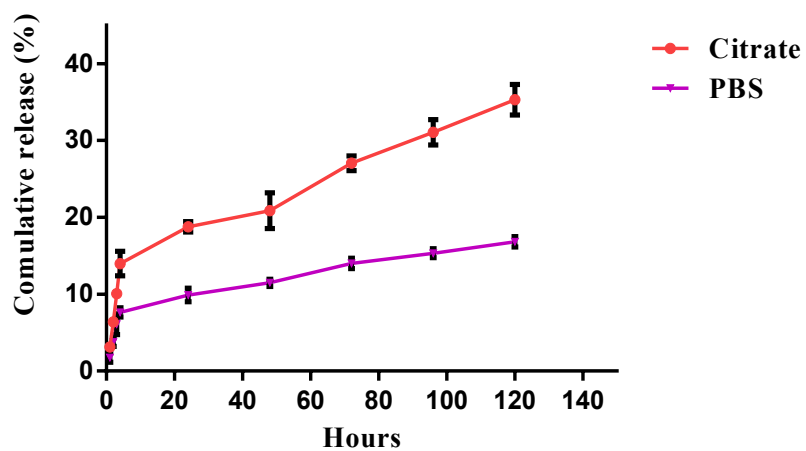

Figure S4. Release profile of DOX from DOX@MSNs in citrate buffer (pH 5.4) and PBS (pH 7.4).

**A**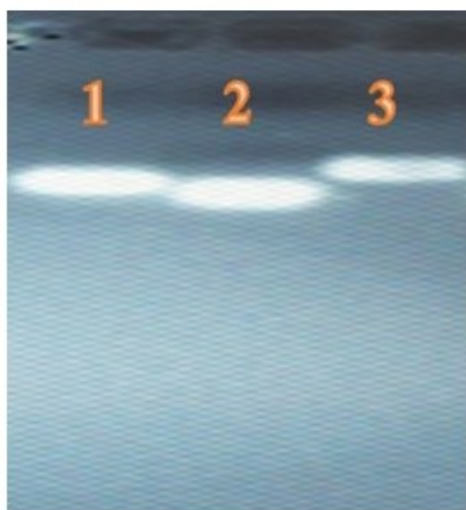**B**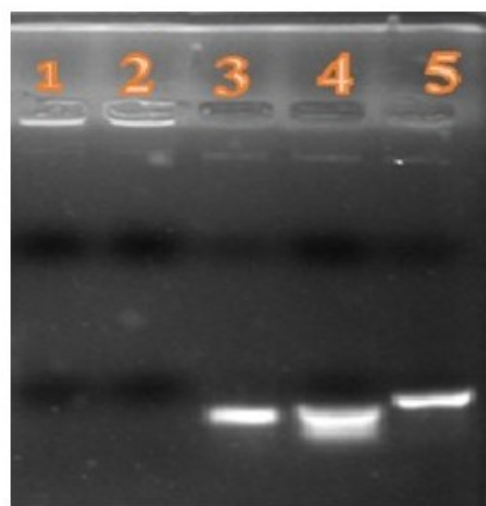

Figure S5. Gel retardation assay. (A) Formation of ATP1/ATP2 aptamers conjugation. Lane 1:ATP1 aptamer, lane 2: ATP2 aptamer and lane 3: ATP1 and ATP2 aptamer conjugate; (B) Attachment of aptamers to the surface of MSN. Lane 1: Attachment of ATP aptamers to DOX@MSNs-MUC1 (formation of DOX@MSNs-Apts), lane 2: attachment of MUC1 aptamer to MSNs (formation of DOX@MSNs-MUC1), lane 3: ATP1 aptamer, lane 4: ATP2 aptamer and lane 5: MUC1 aptamer
